# Supplementary material
Source: publisher figshare collection journal article supplement (https://tandf.figshare.com/ndownloader/files/13784981)
Supplement: Supplementary file 1 [file 13784981]

Tris(N-methylferrocenyl-N-(2-phenylethyl)dithiocarbamato-S,S′)cobalt(III) for anion sensing and preparation of cobalt-iron sulfide nanoparticles: a new photocatalyst for the degradation of dyes

Subbiah Thirumaran* and Govindasamy Gurumoorthy

Department of Chemistry, Annamalai University, Annamalainagar- 608 002, India.

Email: [sthirumaran@yahoo.com](mailto:sthirumaran@yahoo.com)

**Supplemental Materials**


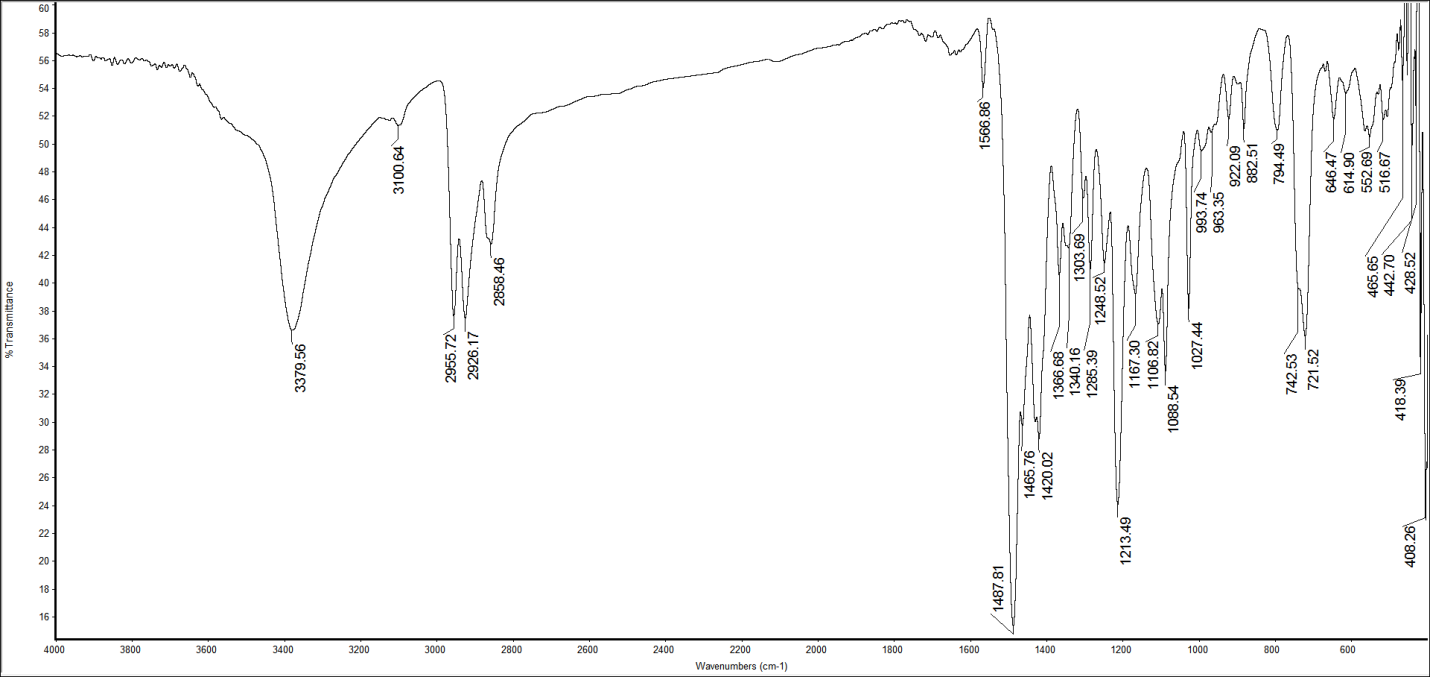


**Figure S 1. FT-IR spectrum of complex 1**


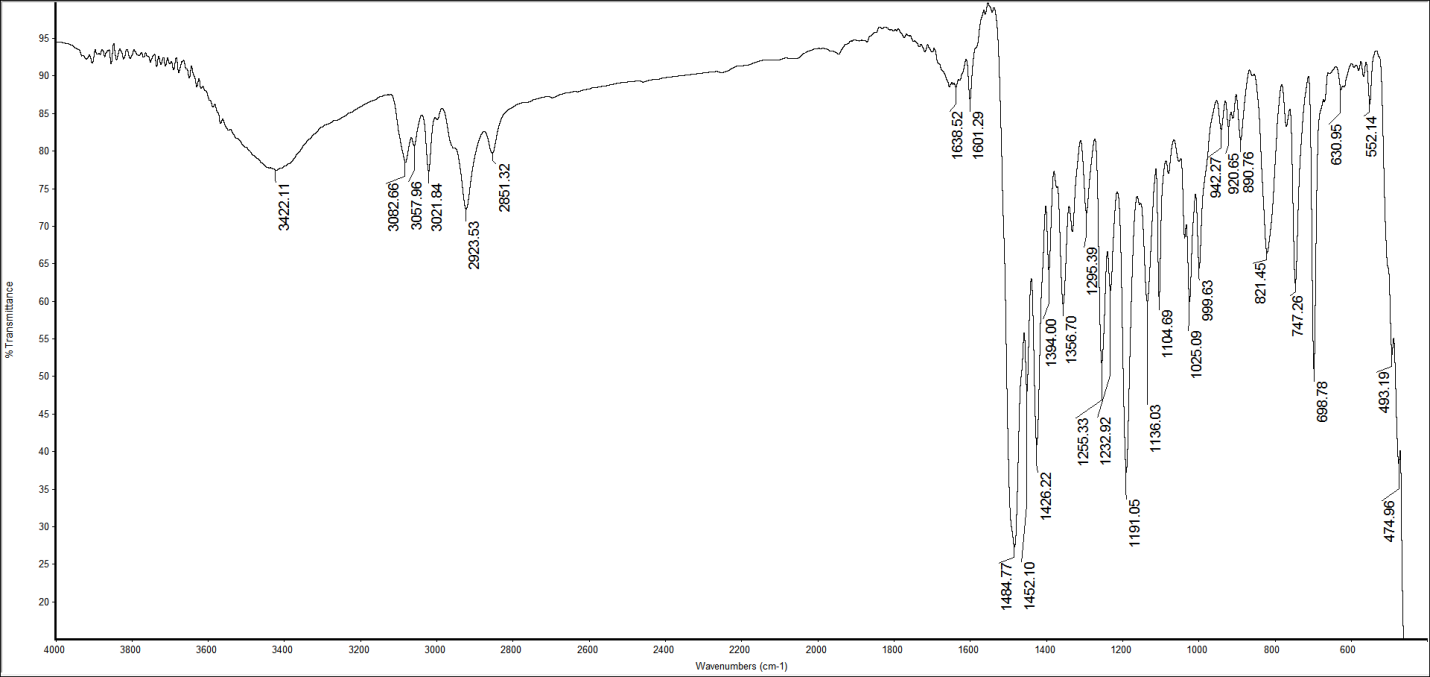


**Figure S 2. FT-IR spectrum of complex 2**

**
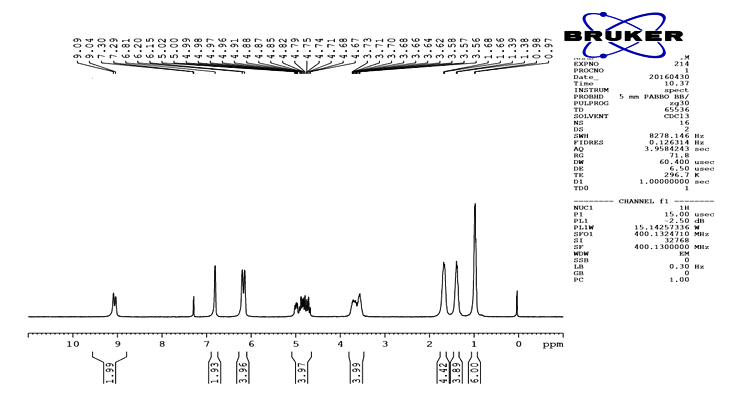
**

**Figure S 3. 1H NMR spectrum of complex 1**

**
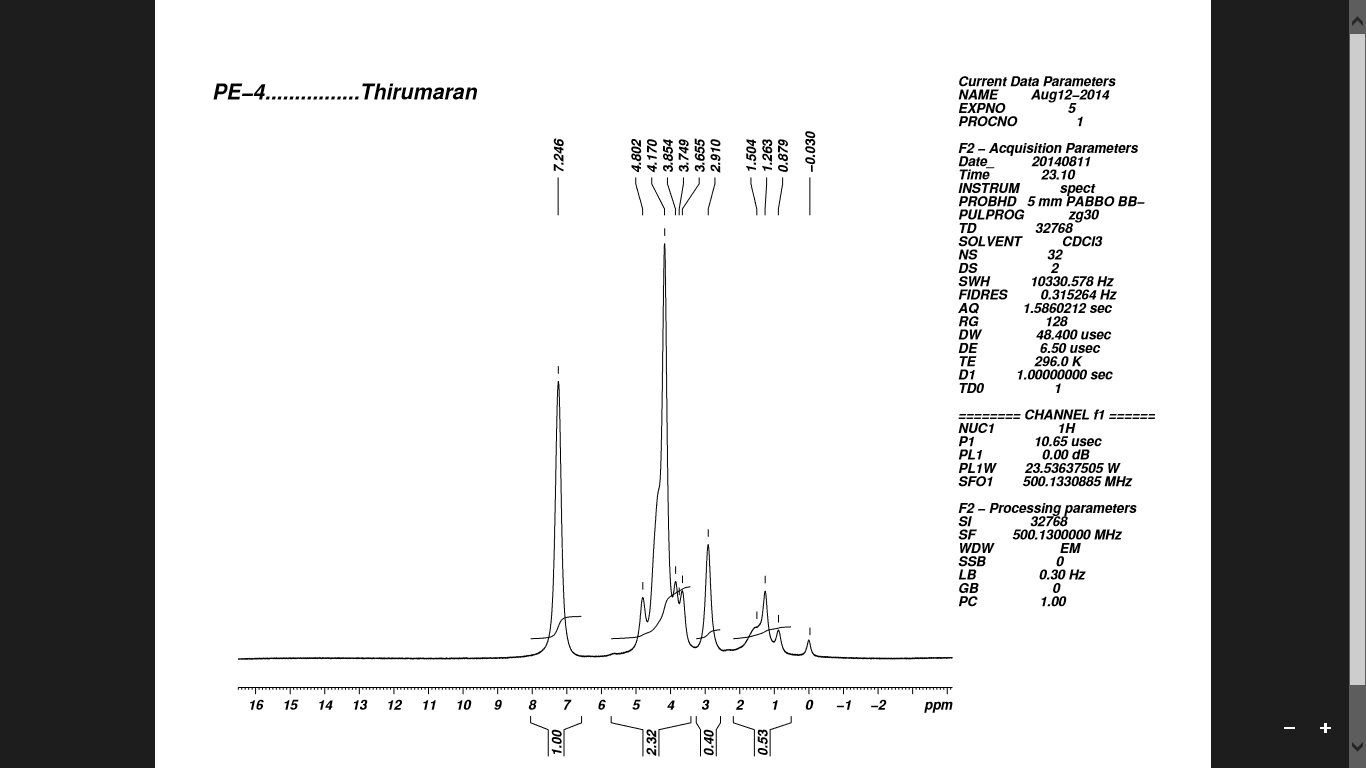
**

**Figure S 4. 1H NMR spectrum of complex 2**

**
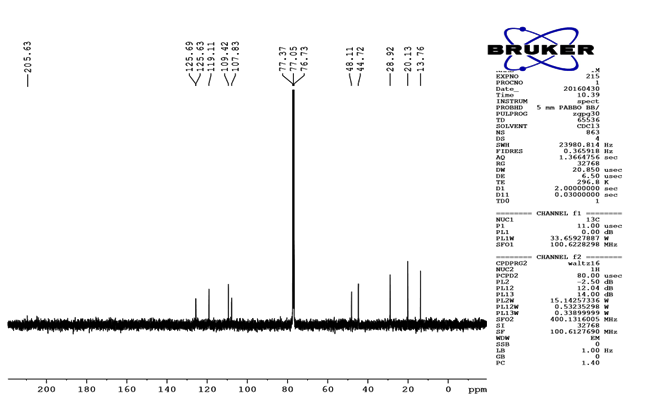
Figure S 5. 13C NMR spectrum of complex 1**

**
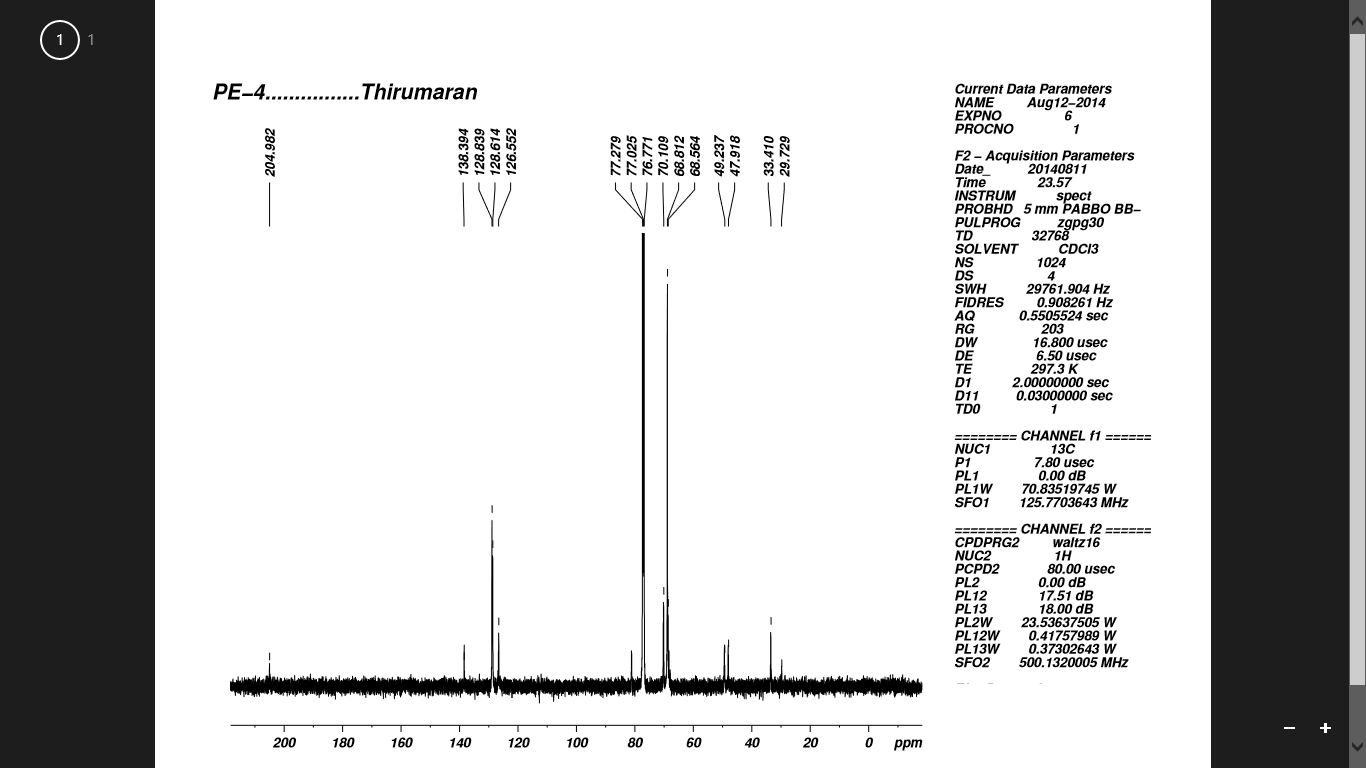
**

**Figure S 6. 13C NMR spectrum of complex 2**

**
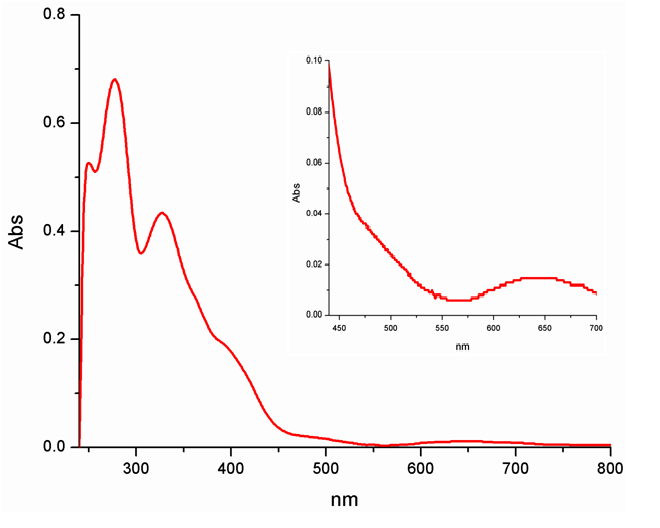
Figure S 7. UV-Vis spectrum of complex 1**


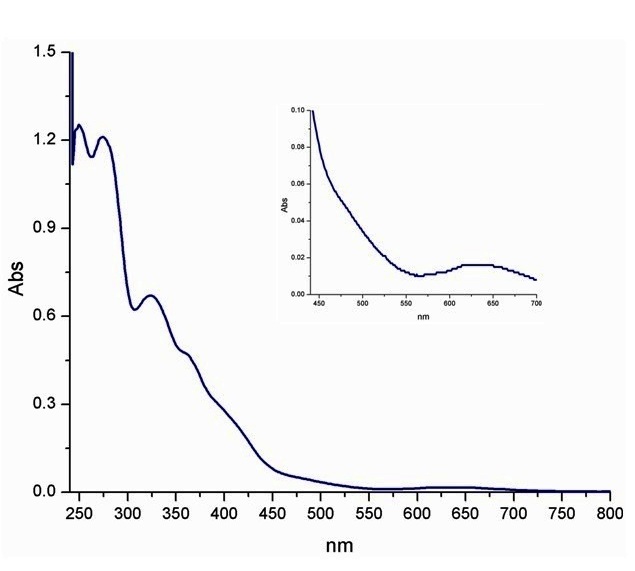


**Figure S 8. UV-Vis spectrum of complex2**

**
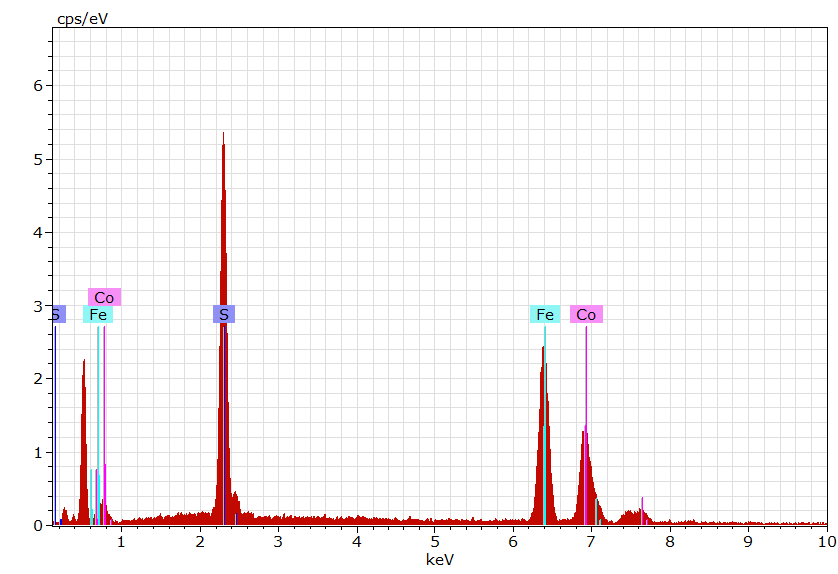
**

**Figure S 9. Energy dispersive X-ray spectrum of cobalt-iron sulfide**

**
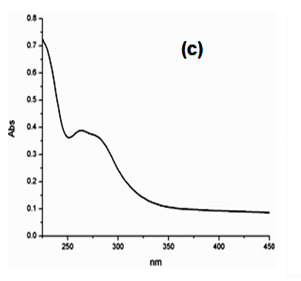
**

**Figure S 10. UV-Vis spectrum of cobalt-iron sulfide**

**

**

**Figure S 11. PL spectrum of cobalt-iron sulfide**

**
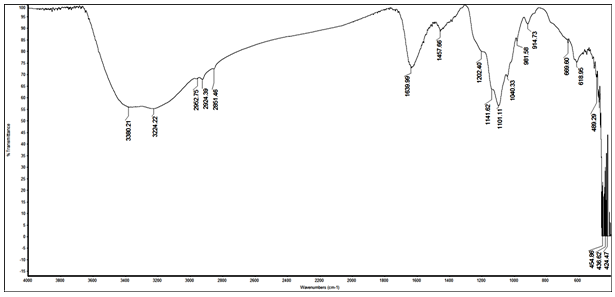
**

**Figure S 12. IR spectrum of cobalt-iron sulfide**
